## Review

# The Genetics of Axonal Transport and Axonal Transport Disorders

Jason E. Duncan, Lawrence S. B. Goldstein

## ABSTRACT

Neurons are specialized cells with a complex architecture that includes elaborate dendritic branches and a long, narrow axon that extends from the cell body to the synaptic terminal. The organized transport of essential biological materials throughout the neuron is required to support its growth, function, and viability. In this review, we focus on insights that have emerged from the genetic analysis of long-distance axonal transport between the cell body and the synaptic terminal. We also discuss recent genetic evidence that supports the hypothesis that disruptions in axonal transport may cause or dramatically contribute to neurodegenerative diseases.

## Introduction

The axon of a neuron conducts the transmission of action potentials from the cell body to the synapse. The axon also provides a physical conduit for the transport of essential biological materials between the cell body and the synapse that are required for the function and viability of the neuron. A diverse array of cargoes including membranous organelles, synaptic vesicle precursors, signaling molecules, growth factors, protein complexes, cytoskeletal components, and even the sodium and potassium channels required for action potential propagation are actively transported from their site of synthesis in the cell body through the axoplasm to intracellular target sites in the axon and synapse. Simultaneously, neurotrophic signals are transported from the synapse back to the cell body to monitor the integrity of target innervation. The length of axons in the peripheral nervous system can be in excess of one meter in humans, and even longer in larger animals, making these cells particularly reliant on the efficient and coordinated physical transport of materials through the axons for their function and viability.

The length and narrow caliber of axons coupled with the amount of material that must be transported raises the possibility that this system might exhibit significant vulnerability to perturbation. It has been proposed that disruptions in axonal transport may lead to axonal transport defects that manifest as a number of different neurodegenerative diseases [1]. In this review, we focus on the use of genetics to understand axonal transport, including the identification and functional characterization of components required for axonal transport, and the biological and medical consequences when these functions are compromised.

## Basic Features of the Axonal Transport System

Simplistically, the axonal transport system comprises cargo, motor proteins that power cargo transport, cytoskeletal

filaments or “tracks” along which the motors generate force and movement, linker proteins that attach motor proteins to cargo or other cellular structures, and accessory molecules that initiate and regulate transport. Defective axonal transport and neurodegenerative diseases could potentially result from disruptions in any of the components required for axonal transport.

Long-distance transport in the axon is primarily a microtubule-dependent process. The microtubule tracks within an axon possess inherent polarity and are uniformly oriented with the fast-growing (plus) ends projecting toward the synapse and the slow-growing (minus) ends toward the cell body [2]. The motor proteins that power axonal transport on microtubules are members of the kinesin and cytoplasmic dynein superfamilies. Kinesins are generally plus-end-directed motor proteins that transport cargoes such as synaptic vesicle precursors and membranous organelles anterogradely toward the synapse (Figure 1). Cytoplasmic dyneins are minus-end-directed motor proteins that transport cargoes including neurotrophic signals, endosomes, and other organelles and vesicles retrogradely toward the cell body (Figure 1). Retrograde transport may not be exclusive to dyneins, however, as a few kinesins that translocate cargo in the retrograde direction have been identified [3,4]. In mammals, the kinesin superfamily consists of approximately 45 members (KIFs) grouped into 14 subfamilies (reviewed in [5]). Kinesins comprise one to four motor polypeptides called heavy chains that contain a highly conserved motor domain, with ATPase and microtubule-binding regions, and a

**Editor:** Elizabeth M. C. Fisher, University College London, United Kingdom

**Citation:** Duncan JE, Goldstein LSB (2006) The genetics of axonal transport and axonal transport disorders. *PLoS Genet* 2(9): e124. DOI: 10.1371/journal.pgen.0020124

**DOI:** 10.1371/journal.pgen.0020124

**Copyright:** © 2006 Duncan and Goldstein. This is an open-access article distributed under the terms of the Creative Commons Attribution License, which permits unrestricted use, distribution, and reproduction in any medium, provided the original author and source are credited.

**Abbreviations:** AchE, acetylcholinesterase; AD, Alzheimer disease; ALS, amyotrophic lateral sclerosis; APP, amyloid precursor protein; ChAT, choline acetyltransferase; CMT, Charcot-Marie-Tooth disease; CSP, cysteine-string protein; Dhc, cytoplasmic dynein heavy chain; Dlc, cytoplasmic dynein light chain; *Dync1h1*, dynein heavy chain gene; GAP-43, growth associated protein 43; GSK 3 $\beta$ , glycogen synthase kinase 3  $\beta$ ; HAP1, Huntingtin-associated protein 1; HD, Huntington disease; HSP, Hereditary Spastic Paraplegia; HSP(SPG 10), Hereditary Spastic Paraplegia Type 10; Htt, huntingtin protein; JIP, JNK interacting protein; JNK, cJun NH<sub>2</sub>-terminal kinase; Khc, kinesin heavy chain; KIFs, kinesin superfamily members; Klc, kinesin light chain; PS1, presenilin-1; Snb-GFP, synaptobrevin-GFP; SOD1, Cu/Zn superoxide dismutase; Syt, synaptotagmin; UNC-104, UNCoordinated-104

Jason E. Duncan and Lawrence S. B. Goldstein are from the Howard Hughes Medical Institute, Department of Cellular and Molecular Medicine, School of Medicine, University of California San Diego, La Jolla, California, United States of America. E-mail: jeduncan@ucsd.edu (JED); lgoldstein@ucsd.edu (LSBG)

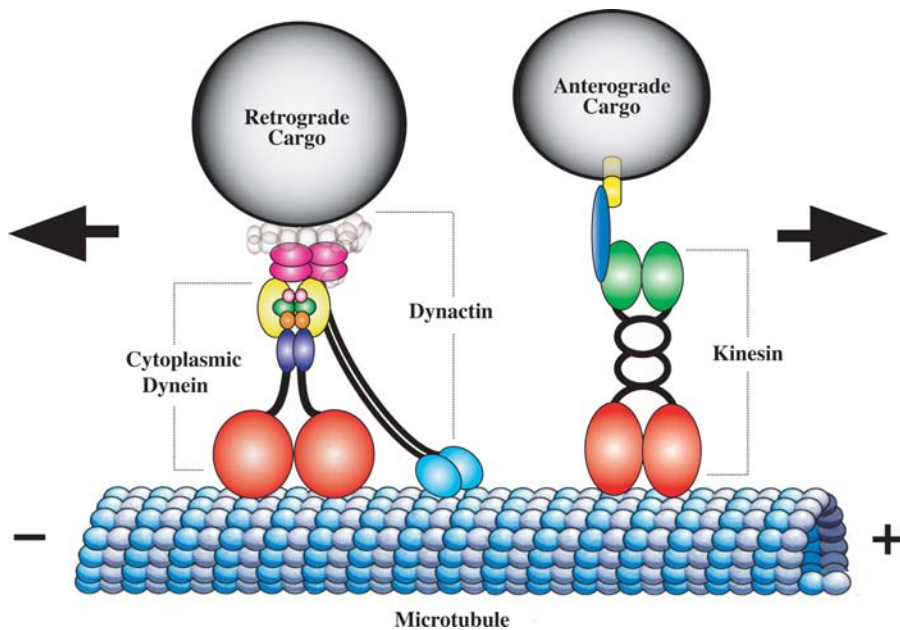

DOI:10.1371/journal.pgen.0020124.g001

**Figure 1.** Cytoplasmic Dynein and Kinesin Power Axonal Transport

Schematic diagram of the microtubule motor proteins cytoplasmic dynein and kinesin. Cytoplasmic dynein transports cargo in the retrograde direction toward the minus ends of microtubules whereas kinesin transports cargo in the anterograde direction toward the plus ends. Cytoplasmic dynein is a large multimeric protein complex comprising two heavy chain subunits (red) that possess microtubule binding and ATPase activity, two intermediate chains (yellow), two light intermediate chains (indigo), and an assortment of light chains (light pink, green, orange) (reviewed in [7]). Dynactin, a large multisubunit protein complex of comparable size to cytoplasmic dynein, is proposed to link the dynein motor to cargo and/or increases its processivity. The largest dynactin subunit, p150<sup>Glued</sup> (turquoise), forms an elongated dimer that interacts with the dynein intermediate chain and binds to microtubules via a highly conserved CAP-Gly motif at the tip of globular heads. The dynactin subunit p50 (dark pink) occupies a central position linking p150<sup>Glued</sup> to cargo. The conventional kinesin holoenzyme, also known as kinesin-1, is a heterotetramer comprising two Khc subunits (red) with microtubule binding and ATPase domains, a central coiled stalk, and a tail domain that interacts with two Klc subunits (green). Klcs may mediate cargo-binding via an intermediate scaffold protein (blue) that binds a cargo transmembrane protein (yellow).

divergent tail domain. Regulatory and/or accessory subunits, such as the kinesin light chain (Klc), are thought to interact with the tail domain of the kinesin heavy chain (Khc) to confer cargo-binding specificity and regulation (Figure 1) (reviewed in [6]). In contrast to kinesin, the cytoplasmic dynein family in mammals is much smaller, consisting of only two members. Cytoplasmic dynein, however, is a larger and more complex microtubule motor, comprising two dynein heavy chain (Dhc) motor subunits and various intermediate, light intermediate, and light chain (Dlc) subunits (Figure 1) (reviewed in [7]). Cytoplasmic dynein appears to employ a “subunit heterogeneity” approach to support a wide range of essential cellular functions with only a few copies of the cytoplasmic dynein motor peptide and a diverse array of dynein-associated accessory proteins that impart cargo-binding specificity and functional activity [6,8]. Considerable evidence suggests that dynein function is dependent on an equally large protein complex called dynactin, which is proposed to link cytoplasmic dynein to its cargo and/or to increase dynein processivity through an association with microtubules (Figure 1) [9,10].

Based on the kinetics of transport determined from classic pulse-chase labeling experiments, axonal transport is classified as either fast or slow (reviewed in [11,12]). Fast axonal transport occurs in both the retrograde and anterograde directions at a rate of 0.5–10  $\mu\text{m}/\text{sec}$  and includes the transport of membrane-bound organelles, mitochondria,

neurotransmitters, channel proteins, multivesicular bodies, and endosomes. In contrast, slow axonal transport occurs in the anterograde direction at a rate of 0.01–0.001  $\mu\text{m}/\text{sec}$ , considerably slower than fast axonal transport [12]. Cytoskeletal components, such as neurofilaments, tubulin, and actin, as well as proteins such as clathrin and cytosolic enzymes are transported at this slower rate [12]. Current thought is that slow axonal transport is mediated by the same microtubule motors that participate in fast axonal transport, with fast instantaneous transport of cargo interspersed with prolonged pauses [13–15].

### Mutations Disrupting Motor Proteins

Classic studies using extruded squid axoplasm identified kinesin and cytoplasmic dynein as candidate motors required for axonal transport [16–20]. Since then, many different animal model systems have been used to genetically investigate axonal transport mechanisms. Such studies reveal considerable diversity in kinesin function in the axon (Table 1).

The requirement for conventional kinesin (Kinesin-1) in axonal transport was revealed in *Drosophila melanogaster* larvae with lesions in *Khc* and *Klc* genes. These mutants exhibit axonal swellings containing accumulations of transported vesicles, synaptic membranes, and mitochondria [21–23]. Such axonal “organelle jams” are a phenotypic hallmark of compromised axonal transport and result in a posterior paralysis of mutant larvae. Loss of function of the neuronal

**Table 1. Kinesin Genes Required for Axonal Transport**

| Kinesin Family   | Gene                             | Common Name            | Organism               | Lesion                                                                        | Phenotype/Disease                                                                                    | Inferred Function                               | Accession Number for mRNA | Accession Number for Protein | Reference |
|------------------|----------------------------------|------------------------|------------------------|-------------------------------------------------------------------------------|------------------------------------------------------------------------------------------------------|-------------------------------------------------|---------------------------|------------------------------|-----------|
| <b>Kinesin-1</b> | <i>Kif5A</i>                     | Kinesin heavy chain    | <i>H. sapiens</i>      | Motor domain N256S, microtubule binding domain R280C                          | Hereditary Spastic Paraplegia SPG10                                                                  | Unknown                                         | NM_004984                 | NP_004975                    | [24,25]   |
|                  | <i>Kif5A</i>                     | Kinesin heavy chain    | <i>M. musculus</i>     | Null, conditional knockout                                                    | Loss of large caliber axons, neurofilament accumulation in cell bodies of peripheral sensory neurons | Slow axonal transport of neurofilaments         | NM_008447                 | NP_032473                    | [15]      |
|                  | <i>Kif5B</i>                     | Kinesin heavy chain    | <i>M. musculus</i>     | Null                                                                          | Impaired mitochondrial and lysosomal dispersion                                                      | Mitochondrial transport                         | NM_008448                 | NP_032474                    | [27]      |
|                  | <i>Kif5C</i>                     | Kinesin heavy chain    | <i>M. musculus</i>     | Null                                                                          | Viable, decrease in motor neurons, reduced brain size                                                |                                                 | NM_008449                 | NM_032475                    | [28]      |
|                  | <i>Khc</i>                       | Kinesin heavy chain    | <i>D. melanogaster</i> | <i>Khc</i> <sup>1ts</sup> , <i>Khc</i> <sup>6</sup> , <i>Khc</i> <sup>8</sup> | Axonal swellings containing vesicles, mitochondria, and organelles                                   | Anterograde axonal transport                    | NM_057242                 | NP_476590                    | [22,23]   |
|                  | <i>unc-116</i>                   | Kinesin heavy chain    | <i>C. elegans</i>      | e2281                                                                         | Mislocalization of synaptic vesicles, Jip3                                                           |                                                 | NM_066441                 | NP_498842                    | [48]      |
|                  | <i>KLC1</i>                      | Kinesin light chain    | <i>M. musculus</i>     | Knockout                                                                      | Impaired axonal transport of APP, $\beta$ -secretase, PS1, GAP-43, synapsin 1 and Trk-A              | Anterograde axonal transport                    | AFO55665                  | AAC27740                     | [69,70]   |
|                  | <i>Klc</i>                       | Kinesin light chain    | <i>D. melanogaster</i> | <i>Klc</i> <sup>1</sup> DF(3L)8ex94                                           | Synaptic vesicle accumulation                                                                        | Anterograde axonal transport                    | NM_079325                 | NP_524049                    | [21]      |
| <b>Kinesin-2</b> | <i>Klc2</i>                      | Kinesin light chain    | <i>C. elegans</i>      | km11, km28                                                                    | Mislocalization of Snb-GFP                                                                           | Synaptic vesicle transport                      |                           | AAK52182 <sup>a</sup>        | [92]      |
|                  | <i>Klc</i>                       | Kinesin light chain    | Cell culture           | HA-KLC TPRs, HA-KLC-176                                                       | Mislocalization of JIP2, JIP3                                                                        | Interaction with scaffold proteins              |                           |                              | [47]      |
|                  | <i>Kif3A/3B</i>                  | Heterotrimeric Kinesin | <i>M. musculus</i>     | Antibody microinjection                                                       | Reduced fast axonal transport                                                                        | Axonal transport of fodrin associating vesicles | NM_008443, NM_008444      | NP_032469, NP_032469         | [93,94]   |
|                  | <i>KLP64D</i> ,<br><i>KLP68D</i> | Heterotrimeric Kinesin | <i>D. melanogaster</i> | <i>KLP64D</i> <sup>k5</sup> , siRNA, <i>KLP64D</i> <sup>k5</sup> , siRNA      | Axonal accumulation of AChE and ChAT                                                                 | Axonal transport of AChE and ChAT               | NM_079210, NM_079305      | NP_523934, NP_524029         | [95,96]   |
| <b>Kinesin-3</b> | <i>Kif1A</i>                     | Monomeric Kinesin      | <i>M. musculus</i>     | Knockout                                                                      | Decreased axonal transport of synaptic vesicles                                                      | Synaptic vesicle transport                      | NM_008440                 | NP_003246                    | [30,31]   |
|                  | <i>unc-104</i>                   | Monomeric Kinesin      | <i>C. elegans</i>      | 17 alleles including rh443, rh142                                             | Paralyzed locomotion, poor growth                                                                    | Synaptic vesicle transport                      | NM_171017                 | NP_741019                    | [29]      |
|                  | <i>Kif1B</i> $\beta$             | Monomeric Kinesin      | <i>M. musculus</i>     | Knockout                                                                      | Reduced axonal transport of Syt. SV2                                                                 | Synaptic vesicle transport                      | NM_207682 <sup>a</sup>    | NP_997565 <sup>a</sup>       | [32]      |
|                  | <i>Kif1B</i> $\beta$             | Monomeric Kinesin      | <i>H. sapiens</i>      | ATP binding domain Q98L                                                       | Charcot-Marie-Tooth Disease Type 2A1                                                                 | Synaptic vesicle transport                      |                           |                              | [32]      |

Knockout or mutagenic lesions in the listed genes that encode protein components of kinesin motors result in defective axonal transport. Accession numbers for each gene were obtained from the National Center for Biotechnology Information (NCBI) database (<http://www.ncbi.nlm.nih.gov>) accessed 2 May 2006.

<sup>a</sup>Denotes genes that have multiple accession numbers for different isoforms derived from alternative splicing. DOI: 10.1371/journal.pgen.0020124.t001

Kinesin-1 family member KIF5A is linked to the human neurodegenerative disease Hereditary Spastic Paraplegia (HSP) Type 10 (HSP(SPG10)) [24,25]. HSP is a group of clinically heterogeneous neurodegenerative disorders characterized by progressive spasticity and mild weakness of the lower limbs [26]. Although the mechanistic cause of HSP(SPG10) remains unclear, the observation that KIF5A is required for the transport of neurofilaments implies a possible defect in slow axonal transport in the pathogenesis of HSP(SPG10) [15]. The ubiquitous Kinesin-1 family member KIF5B is required for the transport of both mitochondria and lysosomes [27]. Elucidation of a defined cellular role for neuronal-specific Kinesin-1 KIF5C is hindered by its apparent functional redundancy with KIF5A and KIF5B [28].

Members of the Kinesin-3 family, including UNC-104, KIF1A, and KIF1B, are required for the axonal transport of specific membrane-bound organelles such as synaptic vesicle precursors and mitochondria. Mutants of the *unc-104* gene of *C. elegans* are paralyzed and have fewer synaptic vesicles than wild-type animals [29]. The subcellular distribution of other membrane-bound organelles such as the endoplasmic reticulum, Golgi apparatus, and mitochondria appear normal in these mutants, supporting the idea that the specific role for UNC-104 is in the anterograde transport of synaptic vesicle components [29]. Mice lacking KIF1A, a neuronal-specific homolog of UNC-104, die shortly after birth and suffer marked neuronal degeneration associated with a similar decrease in synaptic vesicle transport and a subsequent reduction in the density of these vesicles in the nerve terminals [30]. Fractionation and immunoisolation experiments revealed that KIF1A associates with a specific subclass of synaptic vesicles containing synaptotagmin, synaptophysin, and Rab3A [31]. KIF1B $\beta$  associates with yet a different subclass of synaptic vesicle components that contain synaptophysin, synaptotagmin, and the synaptic membrane integral protein SV2 [32]. Interestingly, the human neurodegenerative disorder Charcot-Marie-Tooth (CMT) disease Type 2A1, an inherited neuropathy characterized by weakness and atrophy of distal muscles, is linked to a mutation in the ATP binding site of the motor domain of human KIF1B $\beta$  [32]. In a KIF1B $\beta$  knockout, heterozygous mice develop multiple nervous-system abnormalities similar to those observed in UNC-104/KIF1A mutants, including a decrease in the transport of synaptic vesicle proteins and a reduction of these vesicles at the synapse [32].

Together these genetic experiments support the hypothesis that KIFs support various cellular functions by transporting different classes of organelles and vesicles in axons.

Unlike the kinesin superfamily, in which different members of a large superfamily support diverse cellular functions, cytoplasmic dynein comprises an invariant motor subunit with variations in other protein subunits that potentially alter motor function and cargo specificity. Consequently, isolating and interpreting lesions in the cytoplasmic dynein motor has been difficult since dynein is required for multiple functions in the neuron, including axonal transport [33,34]. Nonetheless, *in vivo* evidence supports a role for cytoplasmic dynein in retrograde axonal transport (Table 2).

Although null mutants die early in development, hypomorphic alleles of the cytoplasmic *Dhc* in *Drosophila* result in larval paralysis with accumulations of synaptic vesicle components in axonal swellings that are

indistinguishable from phenotypes observed in *Khc* mutants [35]. Hypomorphic mutations in both the *C. elegans* *Dhc* and *Dlc* genes also caused reduced locomotion in animals and ectopic accumulation of the synaptic vesicle components synaptobrevin, synaptotagmin, and the kinesin motor UNC-104 at the terminal ends of mechanosensory processes [36]. Finally, two mutations in the mouse dynein heavy chain gene (*Dync1h1*), *Loa* and *Cra1*, cause progressive motor neuron degeneration in heterozygotes [37]. A marked alteration in the retrograde transport of a fluorescent tetanus toxin tracer was observed in cultured motor neurons isolated from *Loa* homozygous mice [37]. Although mutant forms of the *Dync1h1* gene are ubiquitously expressed in heterozygous mice, the lesions appear to primarily perturb axonal transport in motor neurons, indicating that for unknown reasons, motor neurons are extremely sensitive to alterations in dynein function [37].

### Mutations in Non-Motor Components Disrupt Axonal Transport

Lesions in kinesin and cytoplasmic dynein disrupt critical functions in axonal transport, but factors associated with the motors, such as dynactin, may also be essential for transport (Table 3). Membrane-bound organelles transported in the axon often move bidirectionally, alternating between anterograde and retrograde motion, with net movement in one direction. This suggests that dynein and kinesin are present on the same organelles and their activity is coordinated. One candidate to mediate this coordination is the dynactin complex [38]. Strong genetic interactions have been observed between kinesin, cytoplasmic dynein, and the dynactin complex in *Drosophila* [35]. Dynactin is also required for bidirectional transport of lipid droplets in *Drosophila* embryos and mediates the interaction between kinesin and cytoplasmic dynein in *Xenopus* melanophore cells [39,40]. Consequently, caution must be exercised when interpreting phenotypes associated with mutations in dynactin components because both anterograde and retrograde transport parameters may be affected, as observed in the axonal transport of mitochondria in *Drosophila* p150<sup>Glued</sup> mutants [41]. In another study, the overexpression of a dominant negative form of dynactin component p150<sup>Glued</sup> in *Drosophila* caused phenotypes similar to those observed in both *Dhc* and *Khc* mutants [35]. Partial loss-of-function of p150<sup>Glued</sup> or overexpression of p50 dynamitin in *C. elegans* resulted in ectopic accumulation of synaptic vesicle components [36]. The overexpression of p50 dynamitin disrupts the dynactin complex and inhibits cytoplasmic dynein function, circumventing the difficulty of isolating viable dynein mutants. The targeted overexpression of p50 dynamitin in mouse motor neurons caused an accumulation of synaptophysin and aggregation of neurofilaments in axons, as well as late onset motor neuron degeneration [42]. Although mutant cytoplasmic dynein has yet to be identified as a causative factor of a human neurological disorder, dynactin is directly linked to a number of human neurodegenerative diseases. Lesions in the conserved CAP-Gly microtubule-binding motif of the p150<sup>Glued</sup> subunit of dynactin have been identified in a family with a heritable form of motor neuron disease. These individuals exhibit weakness in the distal limbs, abnormal accumulations of both

**Table 2. Cytoplasmic Dynein and Dynactin Genes Required for Axonal Transport**

| Cytoplasmic Dynein or Dynactin Protein       | Gene                 | Common Name                                                     | Organism               | Lesion                                                            | Phenotype/Disease                                                              | Inferred Function                 | Accession Number mRNA  | Accession Number Protein | Reference |
|----------------------------------------------|----------------------|-----------------------------------------------------------------|------------------------|-------------------------------------------------------------------|--------------------------------------------------------------------------------|-----------------------------------|------------------------|--------------------------|-----------|
| Cytoplasmic dynein heavy chain               | <i>Dync1h1</i>       | Legs at odd angles ( <i>Loa1</i> ), Cramping 1 ( <i>Crat1</i> ) | <i>M. musculus</i>     | F580Y, Y1055C                                                     | Impaired retrograde transport in $\alpha$ motor neurons                        | Retrograde axonal transport       | NM_030238              | NP_084514                | [37]      |
|                                              | <i>dhc-1</i>         | Dynein heavy chain                                              | <i>C. elegans</i>      | js319, js121, or195                                               | Mislocalization of Snb-GFP, Syt, UNC-104                                       | Axonal transport of synaptobrevin | NM_058962              | NP_491363                | [36]      |
|                                              | <i>cDhc64C</i>       | Dynein heavy chain                                              | <i>D. melanogaster</i> | <i>cDhc64C</i> <sup>6-10</sup> , <i>cDhc64C</i> <sup>6-6-16</sup> | Mislocalization of Syt, CSP                                                    | Retrograde axonal transport       | NM_079205 <sup>a</sup> | NP_523929 <sup>a</sup>   | [35]      |
| Cytoplasmic dynein, light intermediate chain | <i>dli-1</i>         | Dynein light, intermediate chain                                | <i>C. elegans</i>      | js351, ku266                                                      | Mislocalization of Snb-GFP, Syt, UNC-104                                       | Component of dynein complex       | NM_070117              | NP_502518                | [36]      |
|                                              | <i>roadblock/LC7</i> | Dynein light chain                                              | <i>D. melanogaster</i> | <i>rob1</i>                                                       | Mislocalization of Syt, ChAT, CSP, Kinesin-I, and Kinesin-II motors            | Modulation of dynein function     | NM_079047              | NP_523771                | [97]      |
| p150                                         | <i>DCTN1</i>         | p150 <sup>Glued</sup> , dynactin                                | <i>H. sapiens</i>      | T1249I, M571T, R785W                                              | Sporadic and familial ALS                                                      | Retrograde axonal transport       | NM_004082 <sup>a</sup> | NP_004073 <sup>a</sup>   | [45]      |
|                                              | <i>DCTN1</i>         | p150 <sup>Glued</sup> , dynactin                                | <i>H. sapiens</i>      | G595                                                              | Inclusions of dynein and dynactin in motor neurons, lower motor neuron disease | Retrograde axonal transport       | NM_004082 <sup>a</sup> | NP_004073 <sup>a</sup>   | [44, 98]  |
| p50                                          | <i>Glued</i>         | p150 <sup>Glued</sup>                                           | <i>D. melanogaster</i> | Overexpression Phs-G <sup>1</sup> , Gl <sup>1</sup>               | Larval paralysis, accumulation of Syt in axons                                 | Retrograde axonal transport       | NM_079337              | NP_081427                | [35]      |
|                                              | <i>dnc-1</i>         | p150 <sup>Glued</sup>                                           | <i>C. elegans</i>      | <i>or404ts</i>                                                    | Mislocalization of Snb-GFP, Syt, UNC-104                                       | Retrograde axonal transport       | NM_069632              | NP_502033                | [36]      |
|                                              | <i>Dctm2</i>         | p50, dynamitin                                                  | <i>M. musculus</i>     | Overexpression                                                    | Impaired retrograde axonal transport, motor neuron disease                     | Retrograde axonal transport       | NM_027151              | NP_081427                | [42]      |
|                                              | <i>dnc-2</i>         | p50, dynamitin                                                  | <i>C. elegans</i>      | Overexpression                                                    | Mislocalization of Snb-GFP, Syt, UNC-104                                       | Retrograde axonal transport       | NM_065885              | NP_498286                | [36]      |

Knockout or mutagenic lesions in the listed genes that encode protein components of the cytoplasmic dynein motor or dynactin complex result in defective axonal transport. Accession numbers for each gene were obtained from the National Center for Biotechnology Information (NCBI) database (<http://www.ncbi.nlm.nih.gov>) accessed 22 August 2006.

<sup>a</sup>Denotes genes that have multiple accession numbers for different isoforms derived from alternative splicing.  
DOI: 10.1371/journal.pgen.0020124.t002

**Table 3. Accessory Genes Required for Axonal Transport**

| Accessory Protein                                      | Gene          | Common Name         | Organism               | Lesion                                                                                         | Phenotype/Disease                                                                      | Inferred Function                        | Accession Number for mRNA | Accession Number for Protein | Reference |
|--------------------------------------------------------|---------------|---------------------|------------------------|------------------------------------------------------------------------------------------------|----------------------------------------------------------------------------------------|------------------------------------------|---------------------------|------------------------------|-----------|
| <b>Amyloid precursor protein</b>                       | <i>App1</i>   | APP, APP-like, Appl | <i>D. melanogaster</i> | App1 <sup>1</sup> , overexpression of APP695, Swedish, London, 695APLP2, APPL, APPLSD          | Synaptic vesicle accumulations                                                         | Linker protein for Kinesin-1             | NM_057278                 | NP_476626                    | [71]      |
| <b>App like interacting protein-1</b>                  | <i>Ap1p1</i>  | Jip1                | <i>D. melanogaster</i> | ek4                                                                                            | Mislocalization of Syd, impaired transport of Snb-GFP, mitochondria                    | Mitochondria, synaptic vesicle transport | NM_167857 <sup>a</sup>    | NP_728574 <sup>a</sup>       | [52]      |
| <b>Huntingtin protein</b>                              | <i>dhtt</i>   | Huntingtin          | <i>D. melanogaster</i> | dhtt RNAi; overexpression of httex1-93Q, MJD78Q, 108Q, 127Q, MJD77Q-NE5                        | Impaired axonal transport, accumulations of CSP, Syd                                   | Unknown                                  | NM_143372                 | NP_651629                    | [76]      |
|                                                        | <i>htt</i>    | Huntingtin          | <i>L. pealii</i>       | HD548-Q62, HD548-Q100                                                                          | Impaired anterograde and retrograde transport                                          | Unknown                                  |                           |                              | [79]      |
|                                                        | <i>Hdh</i>    | Huntingtin          | <i>M. musculus</i>     | HD72                                                                                           | Impaired vesicle and mitochondria transport                                            | Unknown                                  | NM_010414                 | NP_034544                    | [77]      |
| <b>Huntingtin associated protein-1</b>                 | <i>hap1</i>   | HAP-1               | Cell culture           | siRNA                                                                                          | Impaired APP vesicle transport                                                         | Interaction with Klc and Htt             |                           |                              | [75]      |
| <b>Superoxide dismutase 1</b>                          | <i>Sod1</i>   | SOD1                | <i>M. musculus</i>     | G93A                                                                                           | Impaired slow axonal transport, swollen axons with neurofilament accumulations         | Unknown                                  | NM_011434                 | NP_035564                    | [84,85]   |
|                                                        | <i>Sod1</i>   | SOD1                | <i>M. musculus</i>     | G37R, G85R                                                                                     | Impaired slow axonal transport of neurofilaments, $\beta$ -tubulin                     | Unknown                                  | NM_011434                 | NP_035564                    | [83]      |
|                                                        | <i>Sod1</i>   | SOD1                | <i>M. musculus</i>     | G93A                                                                                           | Inhibition of retrograde transport, disruption of dynein localization                  | Unknown                                  | NM_011434                 | NP_035564                    | [88]      |
| <b>presenilin 1</b>                                    | <i>PS1</i>    | Presenilin          | <i>M. musculus</i>     | PS1 knockout, K <sup>M146V</sup>                                                               | Reduced levels of PS1, APP, and Syn in sciatic nerve                                   | Modulation of GSK 3 $\beta$ , Kinesin-1  | NM_008943                 | NP_032969                    | [99]      |
| <b>c-Jun-NH2 terminal Kinase interacting protein 1</b> | <i>Jip1</i>   | Jip1                | Cell culture           | Jip1(307-700), Jip1(Y709A)                                                                     | Jip1 mislocalization in neurites                                                       | Scaffold protein                         | AFO03115                  | Q9WV9 <sup>b</sup>           | [47]      |
| <b>c-Jun-NH2 terminal Kinase</b>                       | <i>jnk-1</i>  | JNK                 | <i>C. elegans</i>      | gk1                                                                                            | Mislocalization of Snb-GFP                                                             | Synaptic vesicle transport               | NM_171371                 | NP_741434                    | [48]      |
| <b>c-Jun-NH2 terminal Kinase</b>                       | <i>jkk-1</i>  | JNK-kinase          | <i>C. elegans</i>      | km2                                                                                            | Mislocalization of Snb-GFP                                                             | Synaptic vesicle transport               | NM_076512                 | NP_508913                    | [48]      |
| <b>Sunday driver</b>                                   | <i>dSyd</i>   | Syd, Jip3, JSAP1    | <i>D. melanogaster</i> | <i>sydZ</i> , <i>sydD1</i> , <i>syd42H</i>                                                     | Synaptic vesicle accumulations                                                         | Scaffold protein                         | NM_079913 <sup>a</sup>    | NP_524652 <sup>a</sup>       | [53]      |
|                                                        | <i>unc-16</i> | Syd, Jip3, JSAP1    | <i>C. elegans</i>      | n730, ju79, e109, ju146                                                                        | Mislocalization of Snb-GFP                                                             | Synaptic vesicle transport               | NM_171221                 | NP_741263                    | [48]      |
| <b>UNC-14</b>                                          | <i>unc-14</i> | UNC-14              | <i>C. elegans</i>      | ju56                                                                                           | Mislocalization of Snb-GFP                                                             | Cargo and regulator of Kinesin-1         | NM_059617                 | NP_492018                    | [92]      |
| <b>UNC-76</b>                                          | <i>unc-76</i> | UNC-76              | <i>D. melanogaster</i> | (1)G0310                                                                                       | Synaptic vesicle accumulations                                                         | Integration of kinesin activity          | NM_166927 <sup>a</sup>    | NP_726792 <sup>a</sup>       | [100]     |
| <b>Milton</b>                                          | <i>mlt</i>    | Milton              | <i>D. melanogaster</i> | <i>mlt</i> <sup>62</sup> , <i>mlt</i> <sup>Δ(2)k14514</sup> , <i>mlt</i> <sup>Δ(2)k66704</sup> | Mislocalization of mitochondria                                                        | Axonal transport of mitochondria         | NM_164736 <sup>a</sup>    | NP_723249 <sup>a</sup>       | [65]      |
| <b>Mitochondrial Rho-GTPase</b>                        | <i>dMiro</i>  | dMiro, Miro         | <i>D. melanogaster</i> | B682, Sd10, Sd23, Sd26, Sd32                                                                   | Mislocalization of mitochondria                                                        | Axonal transport of mitochondria         | NM_170111 <sup>a</sup>    | NP_732936 <sup>a</sup>       | [66]      |
| <b>Apolipoprotein E</b>                                | <i>ApoE</i>   | ApoE                | <i>M. musculus</i>     | Overexpression                                                                                 | Accumulation of mitochondria, Syn, neurofilaments                                      |                                          | NM_009696                 | NP_033826                    | [101]     |
| <b>Heatshock protein 27</b>                            | <i>HSPB1</i>  | HSPB1, hsp27        | <i>H. sapiens</i>      | R127W, S135F, R136W, T151I, P182L                                                              | Charcot-Marie-Tooth disease                                                            | Molecular chaperone                      | NM_001540                 | NP_001531                    | [102]     |
|                                                        | <i>HSPB1</i>  | HSPB1, hsp27        | Cell culture           | P182L                                                                                          | Insoluble intracellular aggregates, sequestration of p150, neurofilaments              | Molecular chaperone                      | NM_001540                 | NP_001531                    | [103]     |
| <b>Paraplegin</b>                                      | <i>Spg7</i>   | Paraplegin          | <i>M. musculus</i>     | knockout                                                                                       | Axonal accumulations of organelles, neurofilaments, Hereditary Spastic Paraplegia SPG7 | Metalloprotease                          | NM_153176                 | NP_694816                    | [104]     |

**Table 3.** Continued

| Accessory Protein | Gene       | Common Name | Organism           | Lesion                             | Phenotype/Disease                                                             | Inferred Function   | Accession Number for mRNA | Accession Number for Protein | Reference   |
|-------------------|------------|-------------|--------------------|------------------------------------|-------------------------------------------------------------------------------|---------------------|---------------------------|------------------------------|-------------|
| <b>Tau</b>        | <i>tau</i> | Tau         | <i>M. musculus</i> | R406W                              | Retarded axonal transport of tau                                              | Microtubule binding | NM_016835 <sup>a</sup>    | NP_058519 <sup>a</sup>       | [58]        |
|                   | <i>tau</i> | Tau         | Cell culture       | Overexpression httau40, tau23, K35 | Retarded axonal transport of tau, APP, mitochondria, vesicles, neurofilaments | Microtubule binding | NM_016835 <sup>a</sup>    | NP_058519 <sup>a</sup>       | [61,62,105] |
|                   | <i>tau</i> | Tau         | <i>M. musculus</i> | Overexpression httau40, T44        | Axonal accumulation of mitochondria, neurofilaments, vesicles                 | Microtubule binding | NM_016835 <sup>a</sup>    | NP_058519 <sup>a</sup>       | [59,60]     |

Knockout or mutagenic lesions in the listed genes that encode for proteins other than motor components result in defective axonal transport. Accession numbers for each gene were obtained from the National Center for Biotechnology Information (NCBI) database (<http://www.ncbi.nlm.nih.gov>), accessed 2 May 2006.

<sup>a</sup>Denotes genes that have multiple accession numbers for different isoforms derived from alternative splicing.

<sup>b</sup>SwissProt Database <http://ca.expasy.org/sprot>.

DOI: 10.1371/journal.pgen.0020124.t003

cytoplasmic dynein and dynactin in motor neurons, and motor neuron degeneration [43,44]. Three additional lesions in the p150<sup>Glued</sup> subunit of dynactin have also been identified in patients with amyotrophic lateral sclerosis [45].

Motor proteins bind to transmembrane proteins on the cargo surface directly, or indirectly, via intermediary scaffold proteins (Figure 1) [6,46]. The cJun NH<sub>2</sub>-terminal kinase (JNK) interacting protein (JIP) group is a class of proteins that may link the kinesin motor to cargo and also act as a scaffold for components of the stress-activated JNK kinase signaling pathway [47]. This implies that the subcellular localization of the JNK signaling complex in the neuron may be regulated by vesicular axonal transport or conversely that kinesin motor activity during axonal transport may itself be regulated via the JNK signaling pathway. In support of the latter, deletion of JNK and JNK kinase results in the mislocalization of synaptic vesicle components in *C. elegans* [48], although this could be due to a requirement of JNK to regulate microtubule dynamics [49]. The JIP1 and JIP2 proteins are thought to link kinesin with apolipoprotein E receptor 2 (ApoER2) on cargo [50,51]. Aplip1, the *Drosophila* JIP1 homolog, is required in axonal vesicle transport and, curiously, the retrograde transport of mitochondria [52]. Sunday Driver (Syd)/JIP3 was identified in *Drosophila* as a scaffold protein possibly required for the interaction of kinesin with vesicles transported in the axon [53]. Interestingly, Syd/JIP3 is implicated as a transport-dependent positive-injury signal in the response to axonal damage [54].

Another interesting process was recently found in studies of the motor domain of KIF5 which has been suggested to interpret variations in microtubule structure in the neuronal cell body to ensure that cargo is directed into the axon [55]. The mechanism by which this occurs is unclear, but microtubule-associated proteins on the surface of microtubules are probable candidates. The predominant microtubule-associated protein in the axon is tau, which promotes microtubule assembly and stability. Mutations in tau not only impair its ability to bind, stabilize, and assemble microtubules [56,57], but also retard its slow transport in the axon [58]. When tau is overexpressed [59,60] or abnormally phosphorylated [61,62], it forms aggregates that may physically block the fast anterograde transport of mitochondria, neurofilaments, peroxisomes, and vesicles carrying the amyloid precursor protein (APP). The retrograde axonal transport of signaling endosomes that provide neurotrophic support for the neuron may also be blocked and prevented from reaching the cell body [63].

The *Drosophila* proteins Milton and mitochondrial GTPase Miro are also required for the transport of mitochondria [64–66]. Lesions in *Milton* and *Miro* result in the specific failure of mitochondria to be transported anterogradely, and they consequently accumulate in the cell body, although the transport of synaptic vesicles is unaffected.

### Links between Axonal Transport and Human Neurodegenerative Disease

Defects in axonal transport have been indirectly linked to a number of progressive human neurodegenerative diseases including Alzheimer disease (AD), Huntington disease (HD), and amyotrophic lateral sclerosis (ALS). One common feature of these diseases is that the proteins encoded by genes linked

to each disease are transported in the axon and can perturb transport when manipulated; presenilin 1 and APP in AD, Cu/Zn superoxide dismutase (SOD1) in ALS, and huntingtin (Htt) in HD. Each disease is characterized by accumulations of these or other proteins within axons, similar to defective axonal transport phenotypes observed in animal models of motor protein mutants.

The pathological hallmarks of AD include neurofibrillary tangles of abnormally phosphorylated tau protein and aggregates of amyloid- $\beta$  (A $\beta$ ) peptide resulting in neuritic plaques in the brain [67]. The transmembrane protein APP, the precursor of potentially neurotoxic A $\beta$ , is transported anterogradely within vesicles in axons by the fast axonal transport system [68]. Interestingly, APP may link the kinesin motor either directly, or indirectly, via the JIP1 scaffold, to a specific class of synaptic vesicles containing synapsin 1, growth-associated protein 43 (GAP-43), along with  $\beta$ -secretase and presenilin 1, two components responsible for processing A $\beta$  from APP [69,70]. Deletion of the APP homolog *App1* in *Drosophila* results in defective axonal transport including axonal accumulation phenotypes [71]. Overexpression of human APP causes similar phenotypes that are enhanced by genetic reduction in kinesin and suppressed by genetic reduction in cytoplasmic dynein [71]. These findings suggest that APP plays a central role in the axonal transport of a specific class of vesicle and that disruption in this transport, through lesions in APP or APP-interacting components, may result in axonal blockages, a possible causative factor in the development of AD.

HD is a progressive neurodegenerative disorder caused by expansion of CAG triplet repeats in the coding sequence of the huntingtin gene resulting in an expanded polyglutamine tract (polyQ) in the Htt protein and a toxic gain of function. Interestingly, both Htt and the Huntingtin-associated protein 1 (HAP1) are anterogradely and retrogradely transported in axons [72]. HAP1 interacts with the anterograde motor kinesin via the Klc subunit and is thought to interact with the retrograde motor cytoplasmic dynein through an association with the p150<sup>Glued</sup> subunit of dynactin [73–75]. Recent studies raise the possibility of a link between axonal transport defects and the onset of HD. In *Drosophila*, both a reduction of Htt protein and the overexpression of proteins containing polyQ repeats result in axonal transport defects [76]. Full-length mutant Htt also impairs vesicular and mitochondrial transport in mouse neurons [77]. Although the mechanism of axonal transport disruption remains unclear, one possibility is that toxic Htt titrates soluble motor protein components into axonal aggregates that physically block transport. One class of vesicle potentially affected are those containing brain-derived neurotrophic factor which would result in loss of neurotrophic support and neuronal toxicity [77,78]. Interestingly, in transport studies performed on extruded squid axoplasm, recombinant Htt fragments with polyQ expansions inhibited fast axonal transport in the absence of aggregate formation [79]. This suggests that polyQ aggregates may not be necessary for axonal transport disruption, but may contribute to or enhance neuronal toxicity. Clearly, a more comprehensive analysis is required to elucidate the mechanism of polyQ toxicity.

Lesions in the ubiquitously expressed enzyme SOD1 are a cause of rare hereditary ALS [80,81]. Mouse models of

hereditary ALS have been generated by transgenic expression of mutant SOD1. These animals have impaired slow axonal transport with axonal accumulations of neurofilaments and tubulin [82–85]. Similarly, large axonal swellings with neurofilament accumulations, consistent with a failure in axonal transport, are observed in patients with ALS [86,87]. It has been suggested that SOD1 may specifically inhibit retrograde axonal transport [88]. The potential involvement of cytoplasmic dynein in ALS was further highlighted by the identification of a number of lesions in the motor binding domain of dynactin subunit p150<sup>Glued</sup> in ALS patients [45]. Additional support comes from the observation that the cytoplasmic dynein mutations *Loa* and *Cra1* revert axonal transport defects of ALS mice, attenuating motor neuron degeneration resulting in delayed onset of disease and extended lifespan [89,90].

## Conclusions and Future Directions

Although a potential link between axonal transport disorders and neurodegenerative disease has been suggested, a number of critical questions remain unanswered. For example, recent evidence indicates that axonal transport is disrupted in mouse models of ALS, HD, and AD long before detectable pathological hallmarks of the disease are observed [77,83,91]. Similarly, comparable pathology may exist early in these human diseases. Yet, it remains unclear whether these changes are causes or consequences of the disease process. Unraveling these issues will require a better understanding of how axonal transport is controlled and which components contribute to the various pathways. In several cases, it is not known whether human mutations represent loss of function or give rise to dominant negative effects, resulting in toxic proteins that titrate or poison axonal transport components. As a result, the effect on axonal transport could be specific and cause the disruption of only a single class of transported material, or nonspecific and reduce or physically block multiple transport pathways through the aggregation of transported cargoes into axonal blockages. It is likely that both mechanisms occur, depending on the nature of the lesion and the motor component involved. Finally, while genetics in model systems will continue to clarify mechanisms, further investigations of heritable neurological disorders in humans may lead to the identification of additional motor proteins or accessory components required for axonal transport. In any event, a more comprehensive understanding of axonal transport may lead to the development of novel therapies for the treatment of neurodegenerative disorders. ■

## Acknowledgments

We apologize to those authors whose work was not cited due to space limitations. The authors thank members of the Goldstein laboratory, Sameer Shah, Carole Weaver, Kristina Schimmelpfeng, Tomas Falzone, Shermali Gunawardena, and Louise Parker for thoughtful discussions and critical reading of the manuscript. Jason Duncan would like to thank Caitlin Foreman for her guidance and support during the writing of this manuscript.

**Author contributions.** JED and LSBG wrote the paper.

**Funding.** LSBG is an investigator of the Howard Hughes Medical Institute.

**Competing interests.** The authors have declared that no competing interests exist.



## References

- Goldstein LS (2003) Do disorders of movement cause movement disorders and dementia? *Neuron* 40: 415–425.
- Heidemann SR, Landers JM, Hamborg MA (1981) Polarity orientation of axonal microtubules. *J Cell Biol* 91: 661–665.
- Hanlon DW, Yang Z, Goldstein LS (1997) Characterization of KIFC2, a neuronal kinesin superfamily member in mouse. *Neuron* 18: 439–451.
- Yang Z, Hanlon DW, Marszalek JR, Goldstein LS (1997) Identification, partial characterization, and genetic mapping of kinesin-like protein genes in mouse. *Genomics* 45: 123–131.
- Miki H, Setou M, Kaneshiro K, Hirokawa N (2001) All kinesin superfamily protein, KIF, genes in mouse and human. *Proc Natl Acad Sci U S A* 98: 7004–7011.
- Goldstein LS (2001) Molecular motors: From one motor many tails to one motor many tales. *Trends Cell Biol* 11: 477–482.
- Pfister KK, Shah PR, Hummerich H, Russ A, Cotton J, et al. (2006) Genetic analysis of the cytoplasmic dynein subunit families. *PLoS Genet* 2: DOI: 10.1371/journal.pgen.0020001
- Tai AW, Chuang JZ, Sung CH (2001) Cytoplasmic dynein regulation by subunit heterogeneity and its role in apical transport. *J Cell Biol* 153: 1499–1509.
- Gill SR, Schroer TA, Szilak I, Steuer ER, Sheetz MP, et al. (1991) Dynactin, a conserved, ubiquitously expressed component of an activator of vesicle motility mediated by cytoplasmic dynein. *J Cell Biol* 115: 1639–1650.
- King SJ, Schroer TA (2000) Dynactin increases the processivity of the cytoplasmic dynein motor. *Nat Cell Biol* 2: 20–24.
- Goldstein LS, Yang Z (2000) Microtubule-based transport systems in neurons: The roles of kinesins and dyneins. *Annu Rev Neurosci* 23: 39–71.
- Shah JV, Cleveland DW (2002) Slow axonal transport: Fast motors in the slow lane. *Curr Opin Cell Biol* 14: 58–62.
- Wang L, Ho CL, Sun D, Liem RK, Brown A (2000) Rapid movement of axonal neurofilaments interrupted by prolonged pauses. *Nat Cell Biol* 2: 137–141.
- Roy S, Coffee P, Smith G, Liem RK, Brady ST, et al. (2000) Neurofilaments are transported rapidly but intermittently in axons: Implications for slow axonal transport. *J Neurosci* 20: 6849–6861.
- Xia CH, Roberts EA, Her LS, Liu X, Williams DS, et al. (2003) Abnormal neurofilament transport caused by targeted disruption of neuronal kinesin heavy chain KIF5A. *J Cell Biol* 161: 55–66.
- Brady ST (1985) A novel brain ATPase with properties expected for the fast axonal transport motor. *Nature* 317: 73–75.
- Vale RD, Reese TS, Sheetz MP (1985) Identification of a novel force-generating protein, kinesin, involved in microtubule-based motility. *Cell* 42: 39–50.
- Paschal BM, Vallee RB (1987) Retrograde transport by the microtubule-associated protein MAP 1C. *Nature* 330: 181–183.
- Paschal BM, Shpetner HS, Vallee RB (1987) MAP 1C is a microtubule-activated ATPase which translocates microtubules in vitro and has dynein-like properties. *J Cell Biol* 105: 1273–1282.
- Schnapp BJ, Reese TS (1989) Dynein is the motor for retrograde axonal transport of organelles. *Proc Natl Acad Sci U S A* 86: 1548–1552.
- Gindhart JG Jr, Desai CJ, Beushausen S, Zinn K, Goldstein LS (1998) Kinesin light chains are essential for axonal transport in *Drosophila*. *J Cell Biol* 141: 443–454.
- Saxton WM, Hicks J, Goldstein LS, Raff EC (1991) Kinesin heavy chain is essential for viability and neuromuscular functions in *Drosophila*, but mutants show no defects in mitosis. *Cell* 64: 1093–1102.
- Hurd DD, Saxton WM (1996) Kinesin mutations cause motor neuron disease phenotypes by disrupting fast axonal transport in *Drosophila*. *Genetics* 144: 1075–1085.
- Reid E, Kloos M, Ashley-Koch A, Hughes L, Bevan S, et al. (2002) A kinesin heavy chain (KIF5A) mutation in hereditary spastic paraplegia (SPG10). *Am J Hum Genet* 71: 1189–1194.
- Fichera M, Lo Giudice M, Falco M, Sturmió M, Amata S, et al. (2004) Evidence of kinesin heavy chain (KIF5A) involvement in pure hereditary spastic paraplegia. *Neurology* 63: 1108–1110.
- McDermott C, White K, Bushby K, Shaw P (2000) Hereditary spastic paraparesis: A review of new developments. *J Neurol Neurosurg Psychiatry* 69: 150–160.
- Tanaka Y, Kanai Y, Okada Y, Nonaka S, Takeda S, et al. (1998) Targeted disruption of mouse conventional kinesin heavy chain, kif5B, results in abnormal perinuclear clustering of mitochondria. *Cell* 93: 1147–1158.
- Kanai Y, Okada Y, Tanaka Y, Harada A, Terada S, et al. (2000) KIF5C, a novel neuronal kinesin enriched in motor neurons. *J Neurosci* 20: 6374–6384.
- Hall DH, Hedgecock EM (1991) Kinesin-related gene unc-104 is required for axonal transport of synaptic vesicles in *C. elegans*. *Cell* 65: 837–847.
- Yonekawa Y, Harada A, Okada Y, Funakoshi T, Kanai Y, et al. (1998) Defect in synaptic vesicle precursor transport and neuronal cell death in KIF1A motor protein-deficient mice. *J Cell Biol* 141: 431–441.
- Okada Y, Yamazaki H, Sekine-Aizawa Y, Hirokawa N (1995) The neuron-specific kinesin superfamily protein KIF1A is a unique monomeric motor for anterograde axonal transport of synaptic vesicle precursors. *Cell* 81: 769–780.
- Zhao C, Takita J, Tanaka Y, Setou M, Nakagawa T, et al. (2001) Charcot-Marie-Tooth disease type 2A caused by mutation in a microtubule motor KIF1Bbeta. *Cell* 105: 587–597.
- Gepner J, Li M, Ludmann S, Kortas C, Boylan K, et al. (1996) Cytoplasmic dynein function is essential in *Drosophila melanogaster*. *Genetics* 142: 865–878.
- Harada A, Takei Y, Kanai Y, Tanaka Y, Nonaka S, et al. (1998) Golgi vesiculation and lysosome dispersion in cells lacking cytoplasmic dynein. *J Cell Biol* 141: 51–59.
- Martin M, Iyadurai SJ, Gassman A, Gindhart JG Jr, Hays TS, et al. (1999) Cytoplasmic dynein, the dynactin complex, and kinesin are interdependent and essential for fast axonal transport. *Mol Biol Cell* 10: 3717–3728.
- Koushika SP, Schaefer AM, Vincent R, Willis JH, Bowerman B, et al. (2004) Mutations in *Caenorhabditis elegans* cytoplasmic dynein components reveal specificity of neuronal retrograde cargo. *J Neurosci* 24: 3907–3916.
- Hafezparast M, Klocke R, Ruhrberg C, Marquardt A, Ahmad-Annuri A, et al. (2003) Mutations in dynein link motor neuron degeneration to defects in retrograde transport. *Science* 300: 808–812.
- Gross SP (2003) Dynactin: Coordinating motors with opposite inclinations. *Curr Biol* 13: R320–R322.
- Gross SP, Welte MA, Block SM, Wieschaus EF (2002) Coordination of opposite-polarity microtubule motors. *J Cell Biol* 156: 715–724.
- Deacon SW, Serpinskaya AS, Vaughan PS, Lopez Fanarraga M, Vernos I, et al. (2003) Dynactin is required for bidirectional organelle transport. *J Cell Biol* 160: 297–301.
- Pilling AD, Horiuchi D, Lively CM, Saxton WM (2006) Kinesin-1 and dynein are the primary motors for fast transport of mitochondria in *Drosophila* motor axons. *Mol Biol Cell* 17: 2057–2068.
- LaMonte BH, Wallace KE, Holloway BA, Shelly SS, Ascano J, et al. (2002) Disruption of dynein/dynactin inhibits axonal transport in motor neurons causing late-onset progressive degeneration. *Neuron* 34: 715–727.
- Puls I, Jonnakuty C, LaMonte BH, Holzbaur EL, Tokito M, et al. (2003) Mutant dynactin in motor neuron disease. *Nat Genet* 33: 455–456.
- Puls I, Oh SJ, Sumner CJ, Wallace KE, Floeter MK, et al. (2005) Distal spinal and bulbar muscular atrophy caused by dynactin mutation. *Ann Neurol* 57: 687–694.
- Munch C, Sedlmeier R, Meyer T, Homberg V, Sperfeld AD, et al. (2004) Point mutations of the p150 subunit of dynactin (DCTN1) gene in ALS. *Neurology* 63: 724–726.
- Kamal A, Goldstein LS (2002) Principles of cargo attachment to cytoplasmic motor proteins. *Curr Opin Cell Biol* 14: 63–68.
- Verhey KJ, Meyer D, Deehan R, Blenis J, Schnapp BJ, et al. (2001) Cargo of kinesin identified as JIP scaffolding proteins and associated signaling molecules. *J Cell Biol* 152: 959–970.
- Byrd DT, Kawasaki M, Walcoff M, Hisamoto N, Matsumoto K, et al. (2001) UNC-16, a JNK-signaling scaffold protein, regulates vesicle transport in *C. elegans*. *Neuron* 32: 787–800.
- Chang L, Jones Y, Ellisman MH, Goldstein LS, Karin M (2003) JNK1 is required for maintenance of neuronal microtubules and controls phosphorylation of microtubule-associated proteins. *Dev Cell* 4: 521–533.
- Stockinger W, Brandes C, Fasching D, Hermann M, Gotthardt M, et al. (2000) The reelin receptor ApoER2 recruits JNK-interacting proteins-1 and -2. *J Biol Chem* 275: 25625–25632.
- Gotthardt M, Trommsdorff M, Nevitt MF, Shelton J, Richardson JA, et al. (2000) Interactions of the low density lipoprotein receptor gene family with cytosolic adaptor and scaffold proteins suggest diverse biological functions in cellular communication and signal transduction. *J Biol Chem* 275: 25616–25624.
- Horiuchi D, Barkus RV, Pilling AD, Gassman A, Saxton WM (2005) APLIP1, a kinesin binding JIP-1/JNK scaffold protein, influences the axonal transport of both vesicles and mitochondria in *Drosophila*. *Curr Biol* 15: 2137–2141.
- Bowman AB, Kamal A, Ritchings BW, Philp AV, McGrail M, et al. (2000) Kinesin-dependent axonal transport is mediated by the sunday driver (SYD) protein. *Cell* 103: 583–594.
- Cavalli V, Kujala P, Klumperman J, Goldstein LS (2005) Sunday driver links axonal transport to damage signaling. *J Cell Biol* 168: 775–787.
- Nakata T, Hirokawa N (2003) Microtubules provide directional cues for polarized axonal transport through interaction with kinesin motor head. *J Cell Biol* 162: 1045–1055.
- Hasegawa M, Smith MJ, Goedert M (1998) Tau proteins with FTDP-17 mutations have a reduced ability to promote microtubule assembly. *FEBS Lett* 437: 207–210.
- Hong M, Zhukareva V, Vogelsberg-Ragaglia V, Wszolek Z, Reed L, et al. (1998) Mutation-specific functional impairments in distinct tau isoforms of hereditary FTDP-17. *Science* 282: 1914–1917.
- Zhang B, Higuchi M, Yoshiyama Y, Ishihara T, Forman MS, et al. (2004) Retarded axonal transport of R406W mutant tau in transgenic mice with a neurodegenerative tauopathy. *J Neurosci* 24: 4657–4667.
- Spittaels K, Van den Haute C, Van Dorpe J, Bruynseels K, Vandezande K, et al. (1999) Prominent axonopathy in the brain and spinal cord of transgenic mice overexpressing four-repeat human tau protein. *Am J Pathol* 155: 2153–2165.
- Ishihara T, Hong M, Zhang B, Nakagawa Y, Lee MK, et al. (1999) Age-

- dependent emergence and progression of a tauopathy in transgenic mice overexpressing the shortest human tau isoform. *Neuron* 24: 751–762.
61. Stamer K, Vogel R, Thies E, Mandelkow E, Mandelkow EM (2002) Tau blocks traffic of organelles, neurofilaments, and APP vesicles in neurons and enhances oxidative stress. *J Cell Biol* 156: 1051–1063.
  62. Mandelkow EM, Stamer K, Vogel R, Thies E, Mandelkow E (2003) Clogging of axons by tau, inhibition of axonal traffic and starvation of synapses. *Neurobiol Aging* 24: 1079–1085.
  63. Delcroix JD, Valletta JS, Wu C, Hunt SJ, Kowal AS, et al. (2003) NGF signaling in sensory neurons: Evidence that early endosomes carry NGF retrograde signals. *Neuron* 39: 69–84.
  64. Gorska-Andrzejak J, Stowers RS, Borycz J, Kostyleva R, Schwarz TL, et al. (2003) Mitochondria are redistributed in *Drosophila* photoreceptors lacking mltin, a kinesin-associated protein. *J Comp Neurol* 463: 372–388.
  65. Stowers RS, Megeath LJ, Gorska-Andrzejak J, Meinertzhagen IA, Schwarz TL (2002) Axonal transport of mitochondria to synapses depends on mltin, a novel *Drosophila* protein. *Neuron* 36: 1063–1077.
  66. Guo X, Macleod GT, Wellington A, Hu F, Panchumarthi S, et al. (2005) The GTPase dMiro is required for axonal transport of mitochondria to *Drosophila* synapses. *Neuron* 47: 379–393.
  67. Cummings JL, Vinters HV, Cole GM, Khachaturian ZS (1998) Alzheimer's disease: Etiologies, pathophysiology, cognitive reserve, and treatment opportunities. *Neurology* 51: S2–S17; discussion S65–S17.
  68. Koo EH, Sisodia SS, Archer DR, Martin LJ, Weidemann A, et al. (1990) Precursor of amyloid protein in Alzheimer disease undergoes fast anterograde axonal transport. *Proc Natl Acad Sci U S A* 87: 1561–1565.
  69. Kamal A, Stokin GB, Yang Z, Xia CH, Goldstein LS (2000) Axonal transport of amyloid precursor protein is mediated by direct binding to the kinesin light chain subunit of kinesin-I. *Neuron* 28: 449–459.
  70. Kamal A, Almenar-Queralt A, LeBlanc JF, Roberts EA, Goldstein LS (2001) Kinesin-mediated axonal transport of a membrane compartment containing beta-secretase and presenilin-1 requires APP. *Nature* 414: 643–648.
  71. Gunawardena S, Goldstein LS (2001) Disruption of axonal transport and neuronal viability by amyloid precursor protein mutations in *Drosophila*. *Neuron* 32: 389–401.
  72. Block-Galarza J, Chase KO, Sapp E, Vaughn KT, Vallee RB, et al. (1997) Fast transport and retrograde movement of huntingtin and HAP 1 in axons. *Neuroreport* 8: 2247–2251.
  73. Li SH, Gutekunst CA, Hersch SM, Li XJ (1998) Interaction of huntingtin-associated protein with dynactin P150Glued. *J Neurosci* 18: 1261–1269.
  74. Engelender S, Sharp AH, Colomer V, Tokito MK, Lanahan A, et al. (1997) Huntingtin-associated protein 1 (HAP1) interacts with the p150Glued subunit of dynactin. *Hum Mol Genet* 6: 2205–2212.
  75. McGuire JR, Rong J, Li SH, Li XJ (2006) Interaction of Huntingtin-associated Protein-1 with Kinesin Light Chain: Implication in intracellular trafficking in neurons. *J Biol Chem* 281: 3552–3559.
  76. Gunawardena S, Her LS, Brusich RG, Laymon RA, Niesman IR, et al. (2003) Disruption of axonal transport by loss of huntingtin or expression of pathogenic polyQ proteins in *Drosophila*. *Neuron* 40: 25–40.
  77. Trushina E, Dyer RB, Badger JD II, Ure D, Eide L, et al. (2004) Mutant huntingtin impairs axonal trafficking in mammalian neurons in vivo and in vitro. *Mol Cell Biol* 24: 8195–8209.
  78. Gauthier LR, Charrin BC, Borrell-Pages M, Dompierre JP, Rangone H, et al. (2004) Huntingtin controls neurotrophic support and survival of neurons by enhancing BDNF vesicular transport along microtubules. *Cell* 118: 127–138.
  79. Szebenyi G, Morfini GA, Babcock A, Gould M, Selkoe K, et al. (2003) Neuropathogenic forms of huntingtin and androgen receptor inhibit fast axonal transport. *Neuron* 40: 41–52.
  80. Rosen DR, Siddique T, Patterson D, Figlewicz DA, Sapp P, et al. (1993) Mutations in Cu/Zn superoxide dismutase gene are associated with familial amyotrophic lateral sclerosis. *Nature* 362: 59–62.
  81. Orrell RW (2000) Amyotrophic lateral sclerosis: Copper/zinc superoxide dismutase (SOD1) gene mutations. *Neuromuscul Disord* 10: 63–68.
  82. Borchelt DR, Wong PC, Becher MW, Pardo CA, Lee MK, et al. (1998) Axonal transport of mutant superoxide dismutase 1 and focal axonal abnormalities in the proximal axons of transgenic mice. *Neurobiol Dis* 5: 27–35.
  83. Williamson TL, Cleveland DW (1999) Slowing of axonal transport is a very early event in the toxicity of ALS-linked SOD1 mutants to motor neurons. *Nat Neurosci* 2: 50–56.
  84. Zhang B, Tu P, Abtahian F, Trojanowski JQ, Lee VM (1997) Neurofilaments and orthograde transport are reduced in ventral root axons of transgenic mice that express human SOD1 with a G93A mutation. *J Cell Biol* 139: 1307–1315.
  85. Sasaki S, Warita H, Abe K, Iwata M (2004) Slow component of axonal transport is impaired in the proximal axon of transgenic mice with a G93A mutant SOD1 gene. *Acta Neuropathol (Berl)* 107: 452–460.
  86. Munoz DG, Greene C, Perl DP, Selkoe DJ (1988) Accumulation of phosphorylated neurofilaments in anterior horn motoneurons of amyotrophic lateral sclerosis patients. *J Neuropathol Exp Neurol* 47: 9–18.
  87. Rouleau GA, Clark AW, Rooke K, Pramatarova A, Krizus A, et al. (1996) SOD1 mutation is associated with accumulation of neurofilaments in amyotrophic lateral sclerosis. *Ann Neurol* 39: 128–131.
  88. Ligon LA, LaMonte BH, Wallace KE, Weber N, Kalb RG, et al. (2005) Mutant superoxide dismutase disrupts cytoplasmic dynein in motor neurons. *Neuroreport* 16: 533–536.
  89. Kieran D, Hafezparast M, Bohnert S, Dick JR, Martin J, et al. (2005) A mutation in dynein rescues axonal transport defects and extends the life span of ALS mice. *J Cell Biol* 169: 561–567.
  90. Teuchert M, Fischer D, Schwalenstoecker B, Habisch HJ, Bockers TM, et al. (2006) A dynein mutation attenuates motor neuron degeneration in SOD1(G93A) mice. *Exp Neurol* 198: 271–274.
  91. Stokin GB, Lillo C, Falzone TL, Brusich RG, Rockenstein E, et al. (2005) Axonopathy and transport deficits early in the pathogenesis of Alzheimer's disease. *Science* 307: 1282–1288.
  92. Sakamoto R, Byrd DT, Brown HM, Hisamoto N, Matsumoto K, et al. (2005) The *Caenorhabditis elegans* UNC-14 RUN domain protein binds to the kinesin-1 and UNC-16 complex and regulates synaptic vesicle localization. *Mol Biol Cell* 16: 483–496.
  93. Yamazaki H, Nakata T, Okada Y, Hirokawa N (1995) KIF3A/B: A heterodimeric kinesin superfamily protein that works as a microtubule plus end-directed motor for membrane organelle transport. *J Cell Biol* 130: 1387–1399.
  94. Takeda S, Yamazaki H, Seog DH, Kanai Y, Terada S, et al. (2000) Kinesin superfamily protein 3 (KIF3) motor transports fodrin-associating vesicles important for neurite building. *J Cell Biol* 148: 1255–1265.
  95. Ray K, Perez SE, Yang Z, Xu J, Ritchings BW, et al. (1999) Kinesin-II is required for axonal transport of choline acetyltransferase in *Drosophila*. *J Cell Biol* 147: 507–518.
  96. Baqri R, Charan R, Schimmelpfeng K, Chavan S, Ray K (2006) Kinesin-2 differentially regulates the anterograde axonal transports of acetylcholinesterase and choline acetyltransferase in *Drosophila*. *J Neurobiol* 66: 378–392.
  97. Bowman AB, Patel-King RS, Benashski SE, McCaffery JM, Goldstein LS, et al. (1999) *Drosophila* roadblock and *Chlamydomonas* LC7: A conserved family of dynein-associated proteins involved in axonal transport, flagellar motility, and mitosis. *J Cell Biol* 146: 165–180.
  98. Levy JR, Sumner CJ, Caviston JP, Tokito MK, Ranganathan S, et al. (2006) A motor neuron disease-associated mutation in p150Glued perturbs dynactin function and induces protein aggregation. *J Cell Biol* 172: 733–745.
  99. Pigino G, Morfini G, Pelsman A, Mattson MP, Brady ST, et al. (2003) Alzheimer's presenilin 1 mutations impair kinesin-based axonal transport. *J Neurosci* 23: 4499–4508.
  100. Gindhart JG, Chen J, Faulkner M, Gandhi R, Doerner K, et al. (2003) The kinesin-associated protein UNC-76 is required for axonal transport in the *Drosophila* nervous system. *Mol Biol Cell* 14: 3356–3365.
  101. Tekotte H, Davis I (2002) Intracellular mRNA localization: Motors move messages. *Trends Genet* 18: 636–642.
  102. Evgrafov OV, Mersyanova I, Irobi J, Van Den Bosch L, Dierick I, et al. (2004) Mutant small heat-shock protein 27 causes axonal Charcot-Marie-Tooth disease and distal hereditary motor neuropathy. *Nat Genet* 36: 602–606.
  103. Ackerley S, James PA, Kalli A, French S, Davies KE, et al. (2006) A mutation in the small heat-shock protein HSPB1 leading to distal hereditary motor neuropathy disrupts neurofilament assembly and the axonal transport of specific cellular cargoes. *Hum Mol Genet* 15: 347–354.
  104. Ferreira-Ferreira F, Quattrini A, Pirozzi M, Valsecchi V, Dina G, et al. (2004) Axonal degeneration in paraplegin-deficient mice is associated with abnormal mitochondria and impairment of axonal transport. *J Clin Invest* 113: 231–242.
  105. Ebner A, Godemann R, Stamer K, Illenberger S, Trinczek B, et al. (1998) Overexpression of tau protein inhibits kinesin-dependent trafficking of vesicles, mitochondria, and endoplasmic reticulum: Implications for Alzheimer's disease. *J Cell Biol* 143: 777–794.
